# Supplementary material for: Microbiome structure variation and soybean’s defense responses during flooding stress and elevated CO2
Source: Front Plant Sci. 2024 Feb 8;14:1295674. doi: 10.3389/fpls.2023.1295674 (PMC10882081; doi:10.3389/fpls.2023.1295674)
Supplement: Supplementary file 2 [file DataSheet_2.xlsx]

## Sheet: Sheet1
Oligo Name	Sequence- 5' to 3'	length	GC	Tm (℃)
SOD1F	GGTACTGTCAGCTTCACTATTACT	24	0.42	56.9
SOD1R	ACCGCCCTTCCTATGATGTT	20	0.5	60
CAT1-F	GGCAGCCCCGAAACCCTCAG	20	0.7	68
CAT1-R	TGAGGCCATCGCGGACGAAG	20	0.65	66
APX1-F	CACTCTGCTGGAACCTTTGAC	21	0.52	57.8
APX1-R	AGAACCCTTAGTGGCATCGG	20	0.55	62
POD-F	TCTCTTCCCTTCAGAAGCTCAA	22	0.45	56.2
POD-R	ATCAAAGCCCCGAACGGAAT	20	0.5	60
NCED3-F	ACCACCTCTTCGACGGCGACGGAATGGT	28	0.61	68
NCED3-R	ATGGCGAGGAGTTTTCCGTTGAAGAAGA	28	0.46	62.5
PAL21-F	GAGTACCGGAGGCCCGTCGT	20	0.7	68
PAL21-R	CACCGAACCCGGTGGTGACG	20	0.7	68
ACT11-F	ATCTTGACTGAGCGTGGTTATTCC	24	0.46	58.6
ACT11-R	GCTGGTCCTGGCTGTCTCC	19	0.68	64
GmNCED3-F	ATGGCGAGGAGTTTTCCGTTGAAGAAGA	28	0.46	62.5
GmNCED3-R	ATGGCGAGGAGTTTTCCGTTGAAGAAGA	28	0.46	62.5
GmDREB2A-F	GGAGAATCCTCGACTTGTCAATGTG	25	0.48	60.5
GmDREB2A-R	CATGTGATCCACAGCCTCATCCTTA	25	0.48	60.5
GmWRKY27-F	GTAACAACAGGTTCCAACCGTTCA	24	0.46	58.6
GmWRKY27-R	CTTCTGGTGATTCAGTTTTGGGATT	25	0.4	57.3
GmNAC29-F	ACGGATGAGGAACTGATTGTGT	22	0.45	56.2
GmNAC29-R	TGGGTACTTCCTGTCTCTTGGA	22	0.5	58.1
GmbZIP1-F	ACCAACACCAACAACATCCA	20	0.45	58
GmbZIP1-R	TTGAATGCTCAGCAGCAACT	20	0.45	58
MAPK16-4-F	GAGGGAGAAGAGCCAACAGG	20	0.6	64
MAPK16-4-R	GCAACACCTGAAGCAACTTGA	21	0.48	55.8
MAPK10-F	TGCTGCGCGTATTCTGCGTGA	21	0.57	59.7
MAPK10-R	CCAGCGAGGGAGTGCCAAGC	20	0.7	68
MAPK-7-F	ATGGGCTTGCTGAGAATAGGTT	22	0.45	56.2
MAPK-7-R	AATGCTTGCCCTTTGGCTTA	20	0.45	58
CDPK5-F	TTGGGCCGGTAATTATTTGCT	21	0.43	53.8
CDPK5-R	GGTGGCGGAGTACTTCATGT	20	0.55	62
CDPK1-F	CCCAAGTGACCACCCAACTC	20	0.6	64
CDPK1-R	TTGTCAAGACCGACCTCGCA	20	0.55	62
Sub1B-F	CTGAAGAAAGACACAGCCATTG	22	0.45	56.2
Sub1B-R	GGGGCACGGTTAACATACTG	20	0.55	62
Sub1C-F	CAAAACGGACGCTTTTGTTA	20	0.4	56
Sub1C-R	CAAAACGGACGCTTTTGTTA	20	0.45	58
TOC1-F	TGGCAGCTTGGACTTGTAGA	20	0.5	60
TOC1-R	ATTCACCCCTTGTTGAGCAC	20	0.5	60
ABAR1-F	GTATCTTCACCATTTACTCTTCCAAGC	27	0.41	59.3
ABAR1-R	GGTGAATAGGCCATTGCCAATGAC	24	0.5	60.4
ABAR2-F	CAAATCTGAACATTGCTTACAAAATGAATGTT	32	0.28	57.6
ABAR2-R	ATTACCATACTGTTTCCCATATACCAG	27	0.37	57.8
GmACT11-Q-F	ATCTTGACTGAGCGTGGTTATTCC	24	0.46	58.6
GmACT11-Q-R	GCTGGTCCTGGCTGTCTCC	19	0.68	64
Adh-2-F	AGCATCCAAGCCATGATCTC	20	0.5	60
Adh-2-R	AGGTACCCTTTAGAGTCCTCTC	22	0.5	58.1
PDC1-F	ATTCCTCACCCCACATTCAG	20	0.5	60
PDC1-R	TCCAACCATTACAGGCTTCAC	21	0.48	55.8
ELF1B-F	GTTGAAAAGCCAGGGGACA	19	0.53	58
ELF1B-R	TCTTACCCCTTGAGCGTGG	19	0.58	60
qWRKY40-F	TGAGCAGGACCAGATACCTACAC	23	0.52	60.2
qWRKY40-R	GAAGGTGCTATGGAACTAAAGGC	23	0.48	58.4
